# Supplementary material
Source: Springer Nature journal article supplement (https://www.springermedizin.de/resource/supplementary/12889_2010_2564_MOESM1_ESM.pdf/9486466)

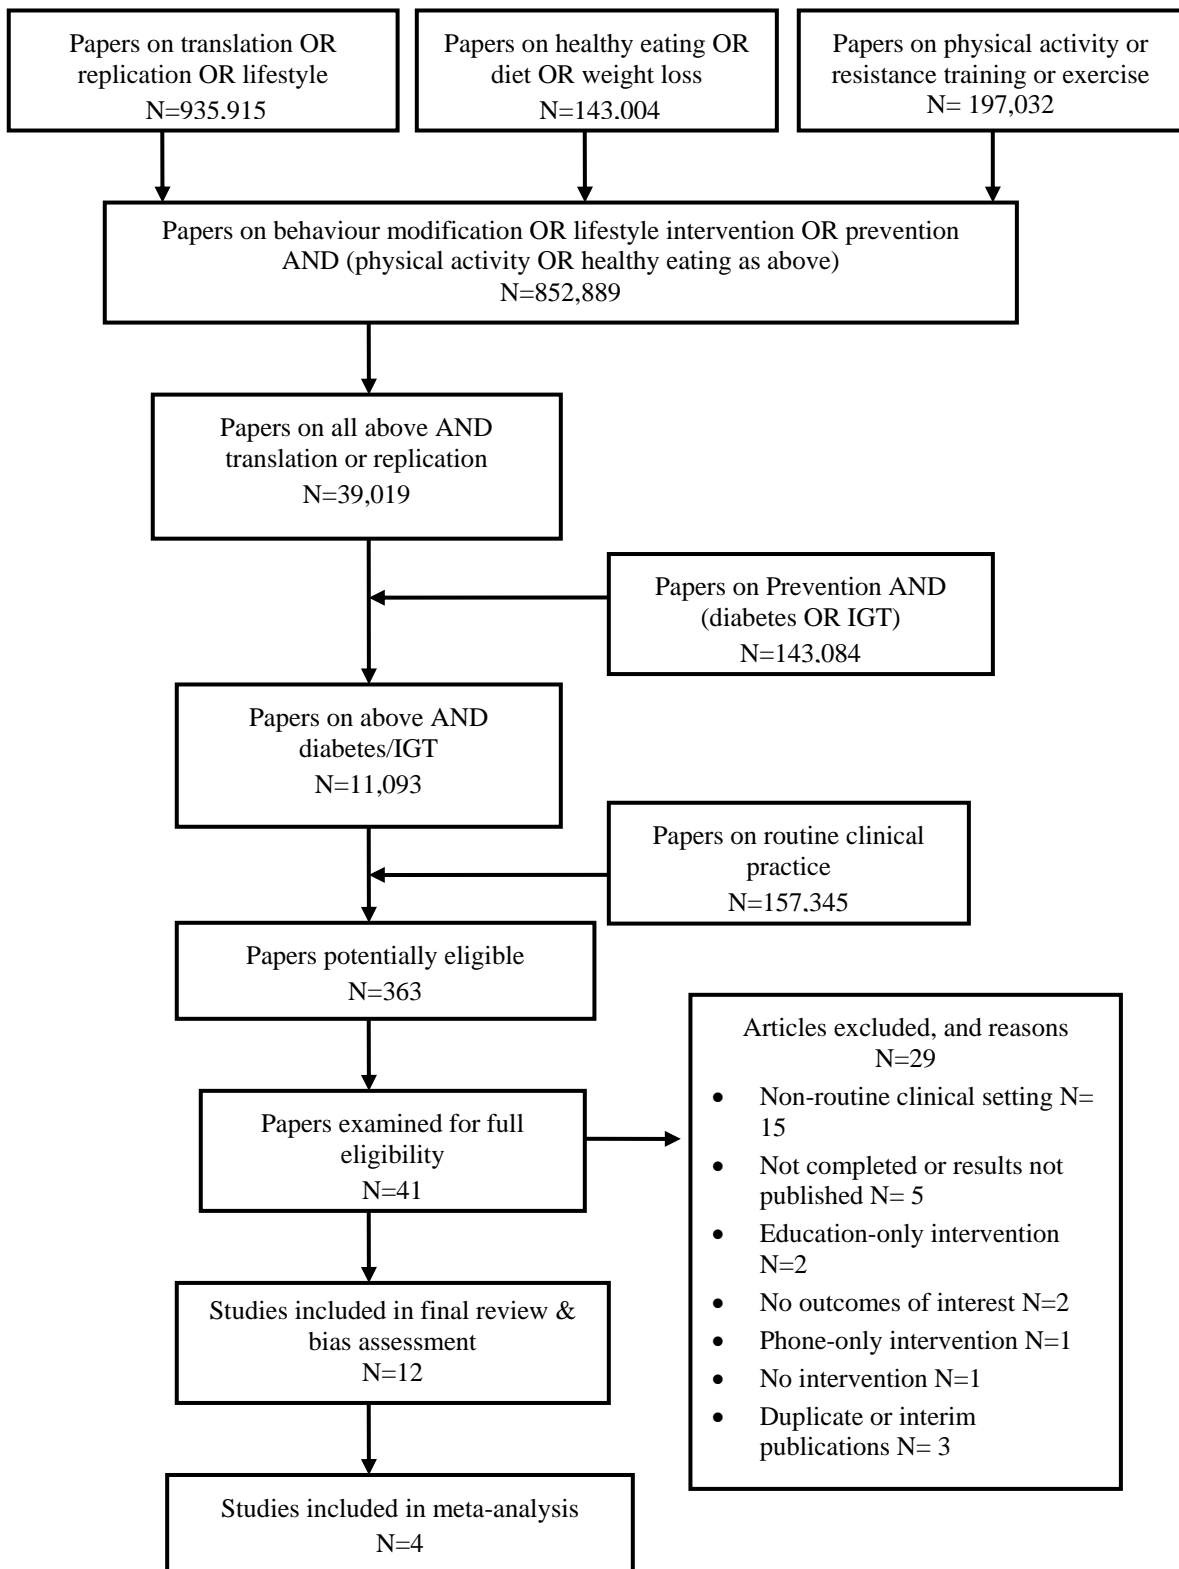

Supplement: MOESM1 [file 9486466]
